# Supplementary material
Source: publisher figshare collection journal article supplement (https://acs.figshare.com/ndownloader/files/4572091)
Supplement: Supplementary file 1 [file 4572091]

# Unusual Conformations of a Hexa-Host Molecule in Solvate Inclusion Compounds

*Dinabandhu Das and Leonard J. Barbour\**

Department of Chemistry, University of Stellenbosch Private bag XI, Stellenbosch, South

Africa. Fax: +27-808-21-3335 Tel: +27-808-21-3335

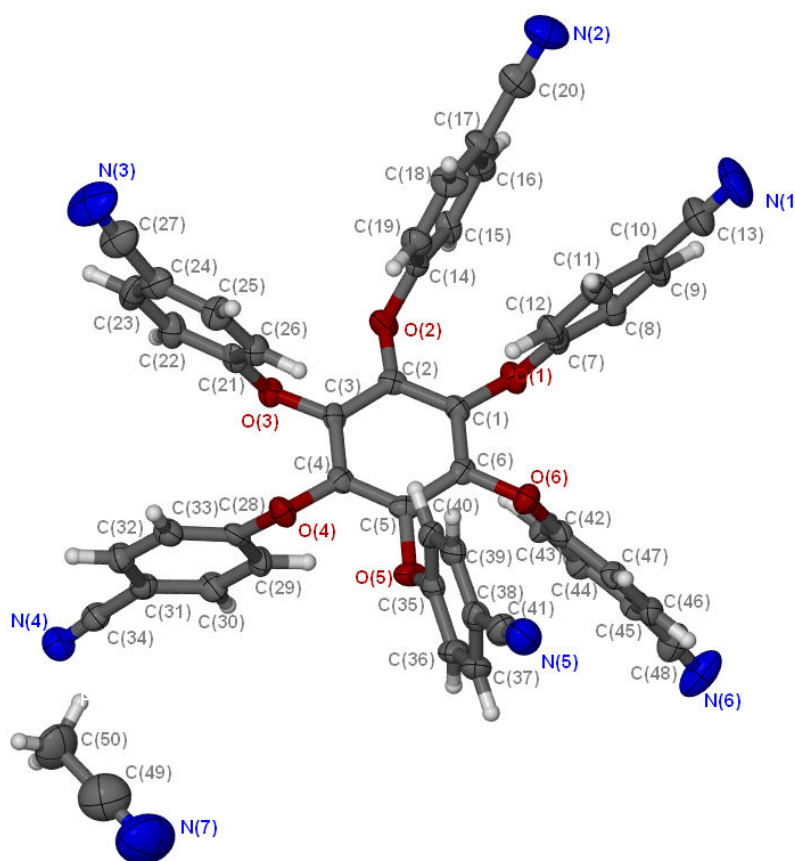

**Figure S1.** Thermal ellipsoid plot of **1a**. Atoms are shown with 70% probability thermal ellipsoids.

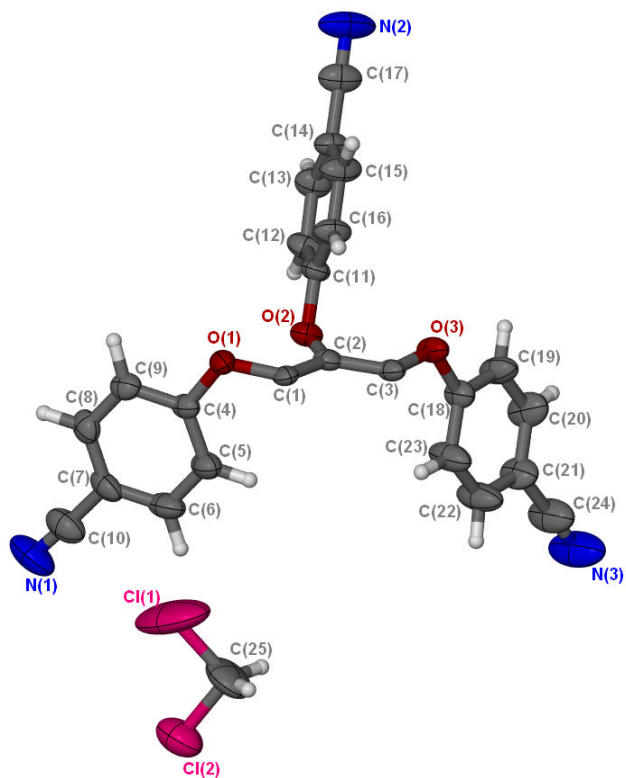

**Figure S2.** Thermal ellipsoid plot of **1b**. Atoms are shown with 70% probability thermal ellipsoids.

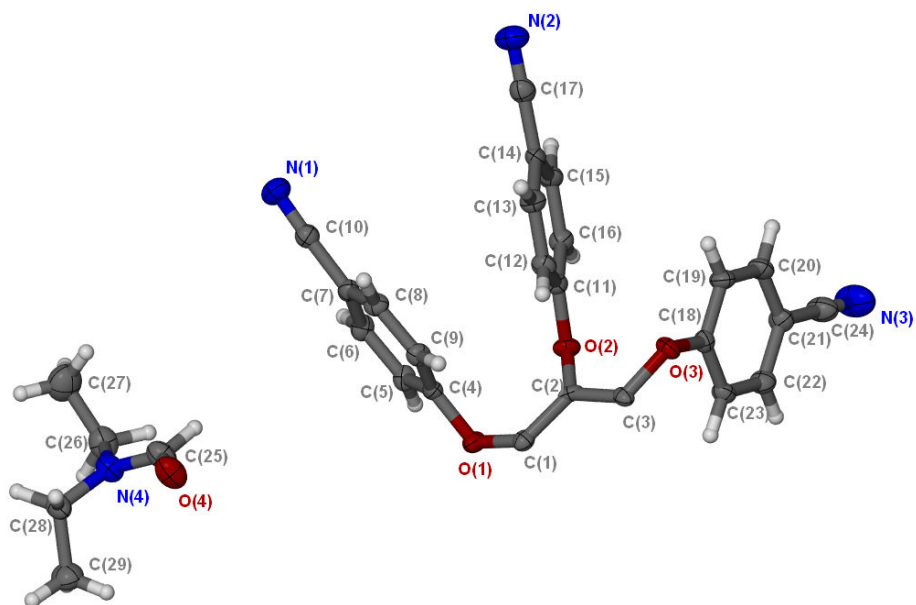

**Figure S3.** Thermal ellipsoid plot of **1c**. Atoms are shown with 70% probability thermal ellipsoids.

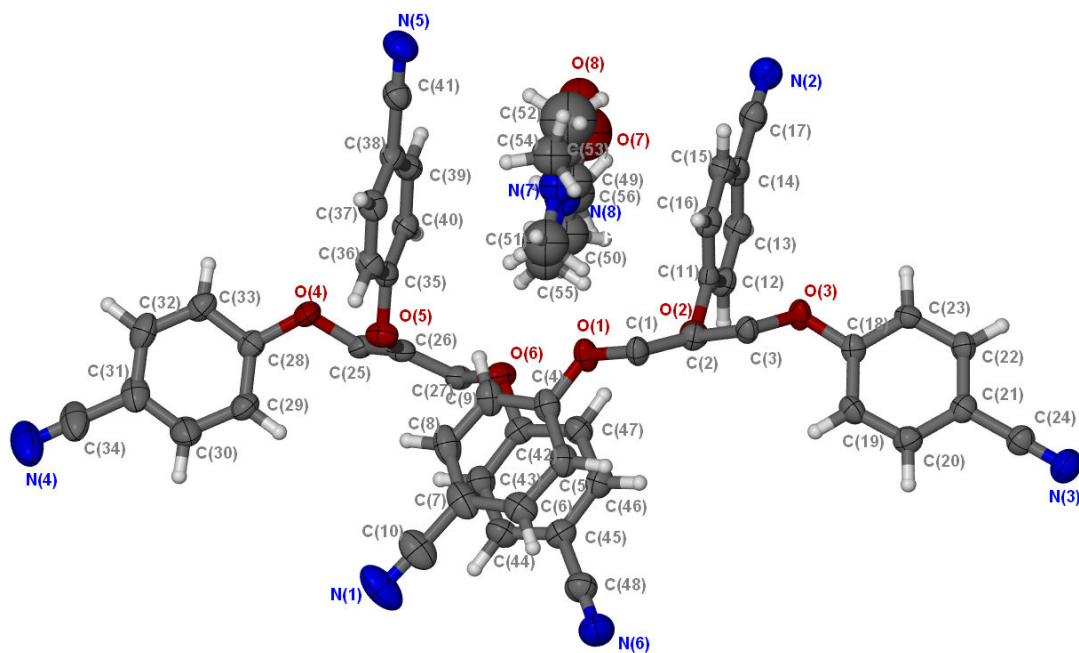

**Figure S4.** Thermal ellipsoid plot of **1d**. Atoms are shown with 70% probability thermal ellipsoids.

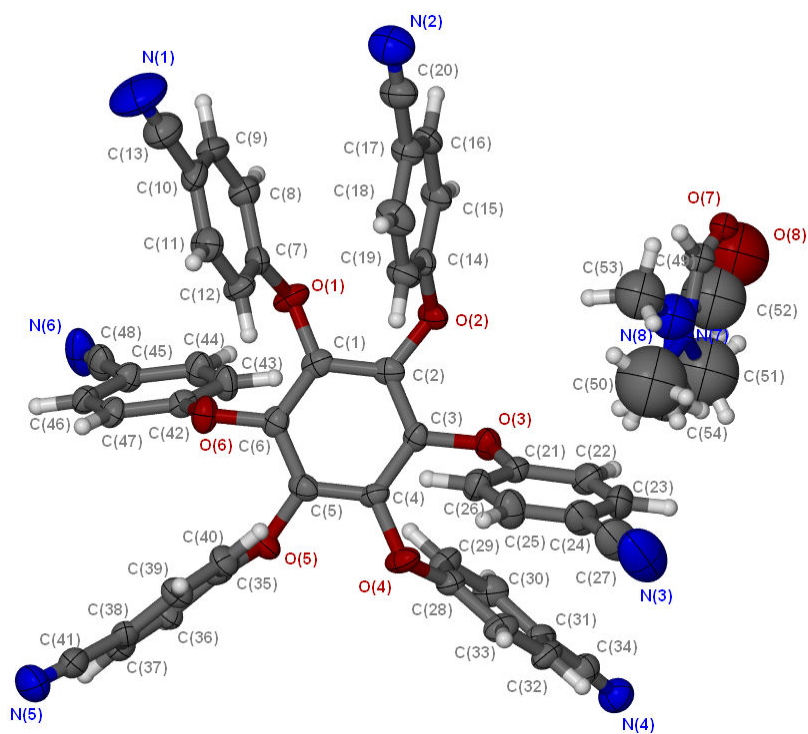

**Figure S5.** Thermal ellipsoid plot of **1e**. Atoms are shown with 70% probability thermal ellipsoids.

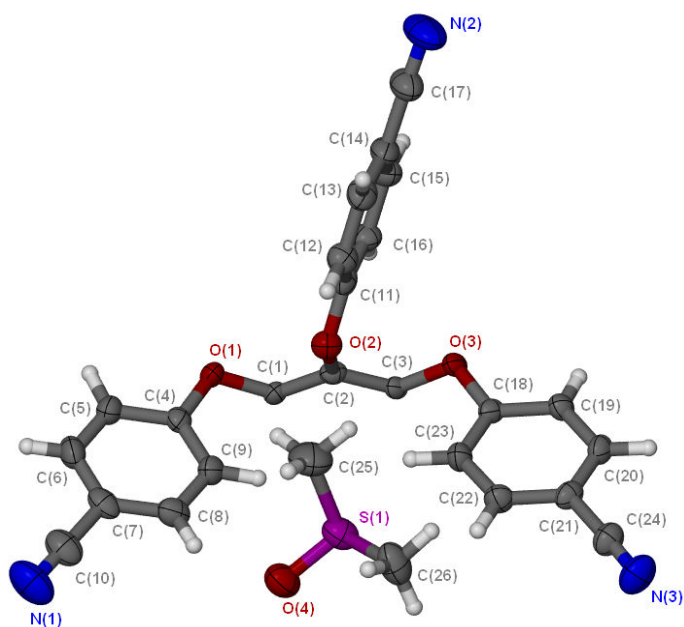

**Figure S6.** Thermal ellipsoid plot of **1f**. Atoms are shown with 70% probability thermal ellipsoids.

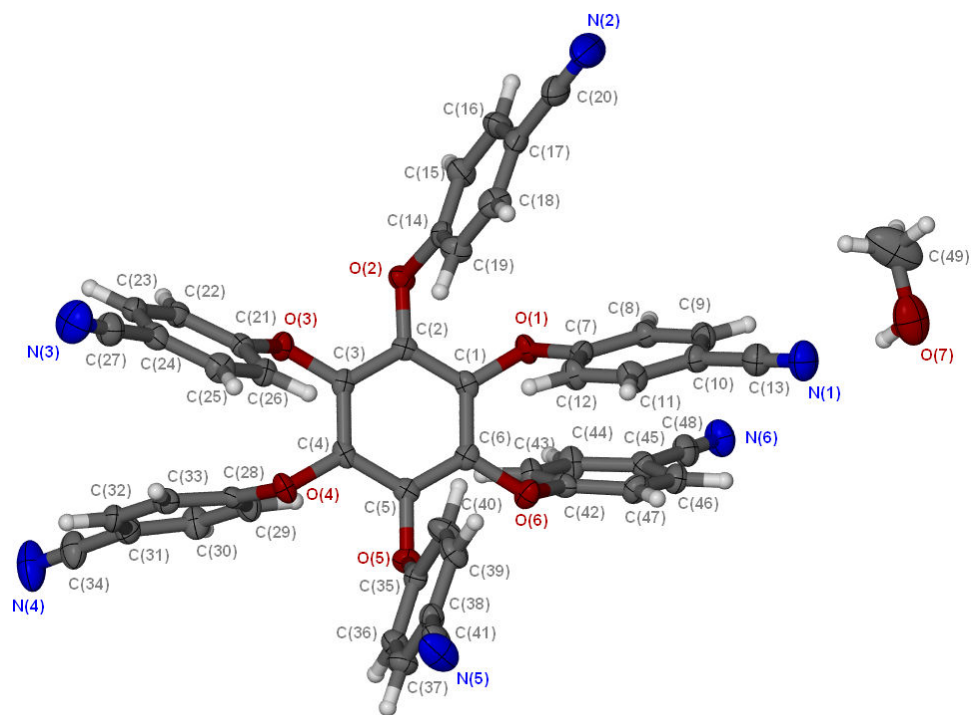

**Figure S7.** Thermal ellipsoid plot of **1g**. Atoms are shown with 70% probability thermal ellipsoids.

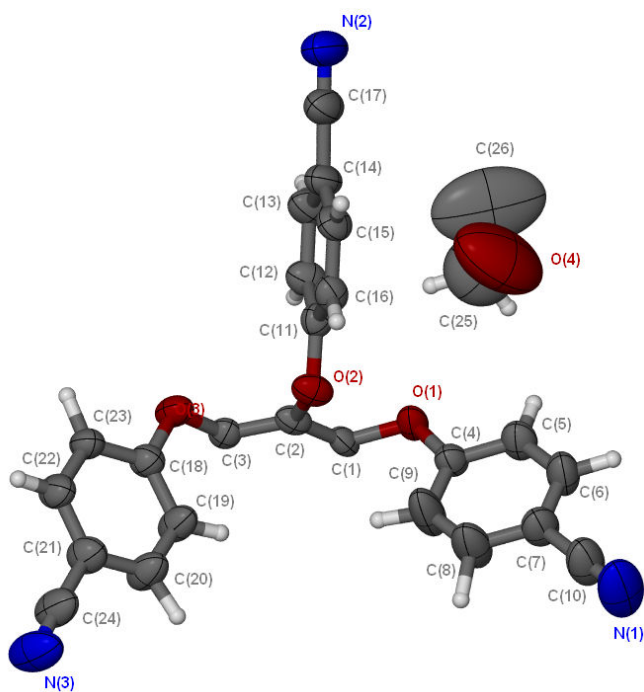

**Figure S8.** Thermal ellipsoid plot of **1h**. Atoms are shown with 70% probability thermal ellipsoids.

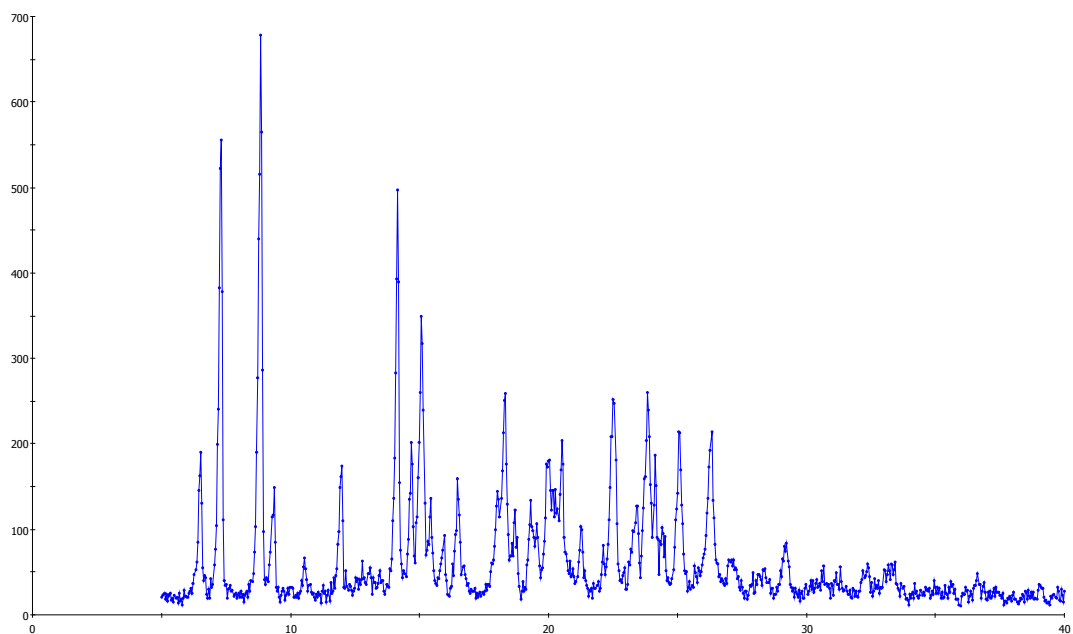

**Figure S9.** Experimental powder X-ray diffraction pattern of **1a**.

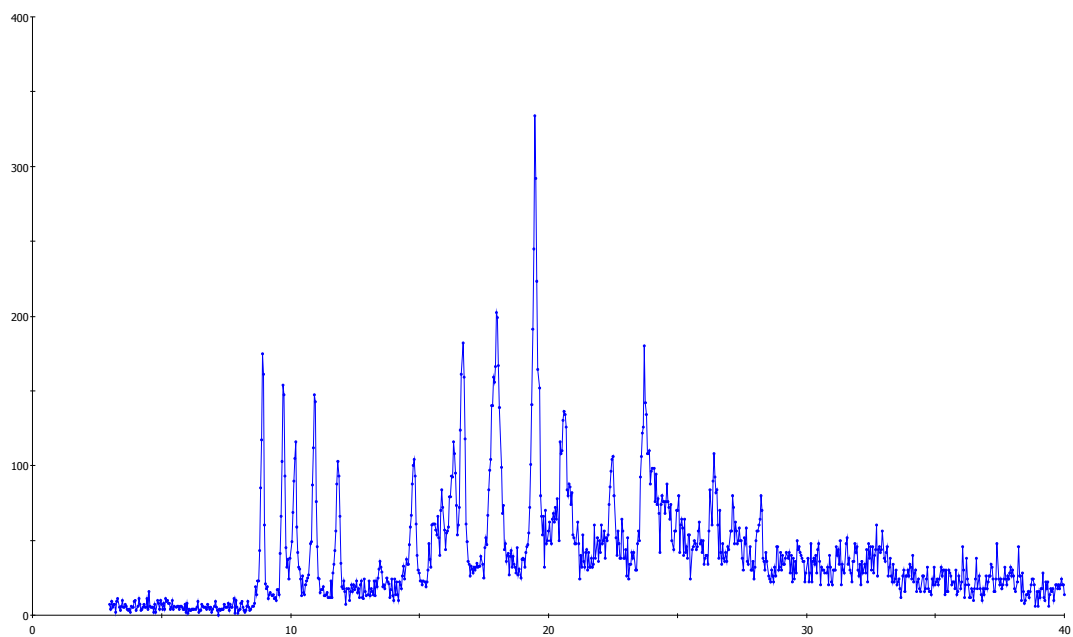

**Figure S10.** Experimental powder X-ray diffraction pattern of **1b**.

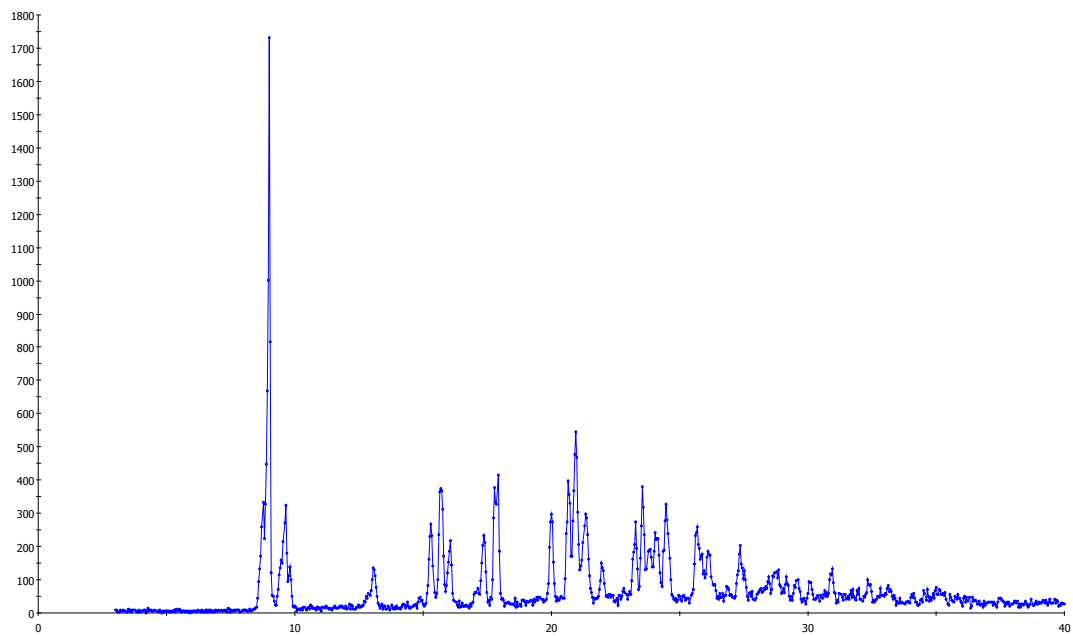

**Figure S11.** Experimental powder X-ray diffraction pattern of **1c**.

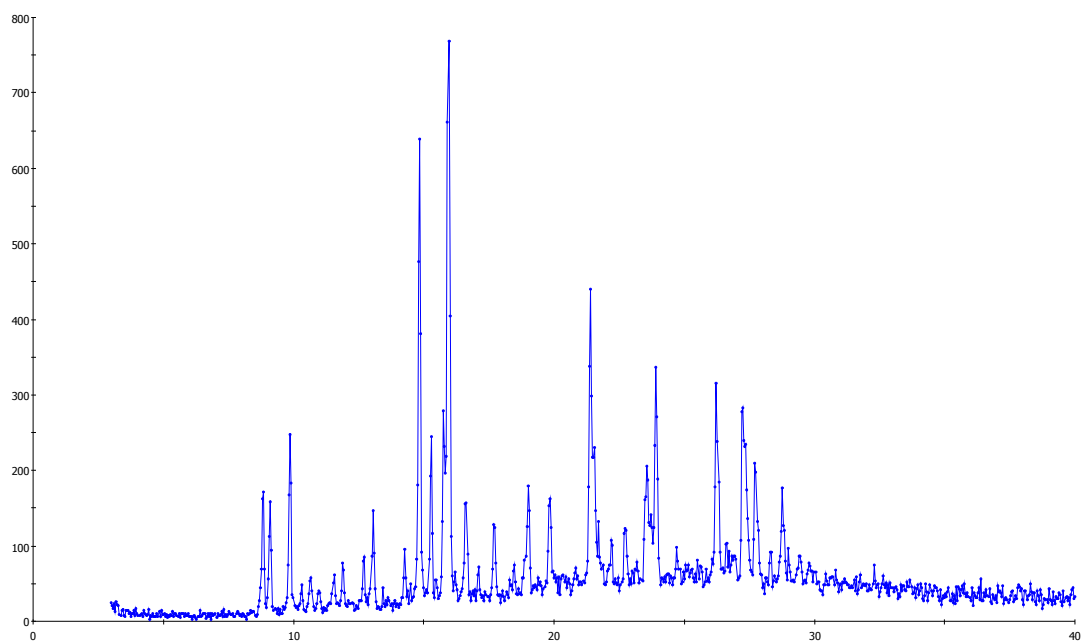

**Figure S12.** Experimental powder X-ray diffraction pattern of **1d**.

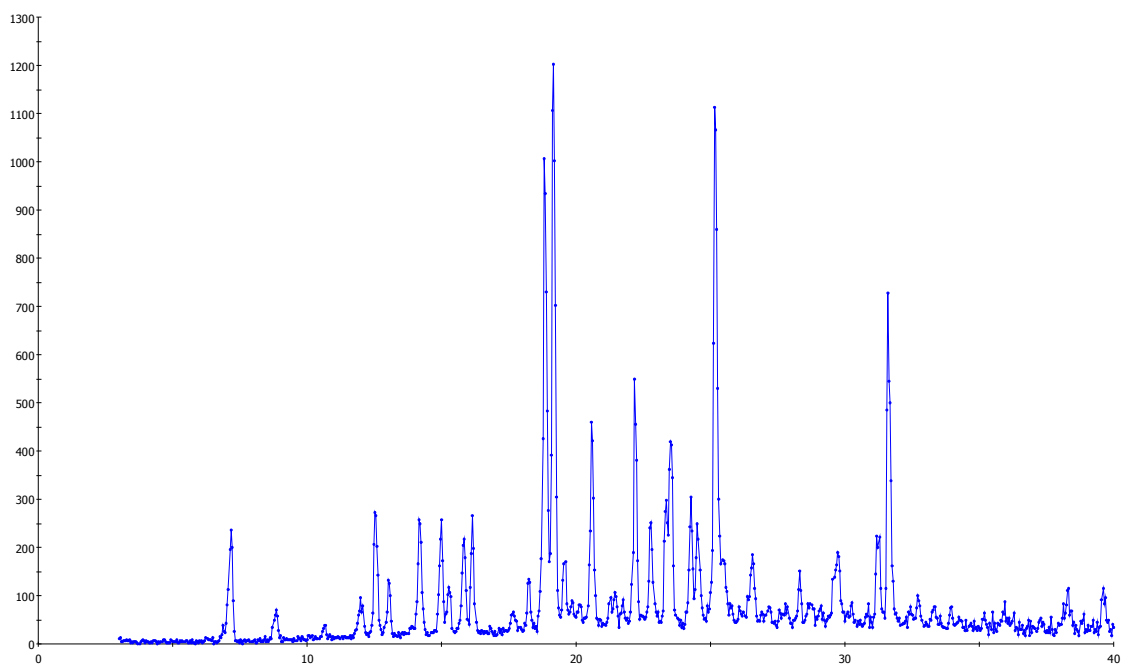

**Figure S13.** Experimental powder X-ray diffraction pattern of **1e**.

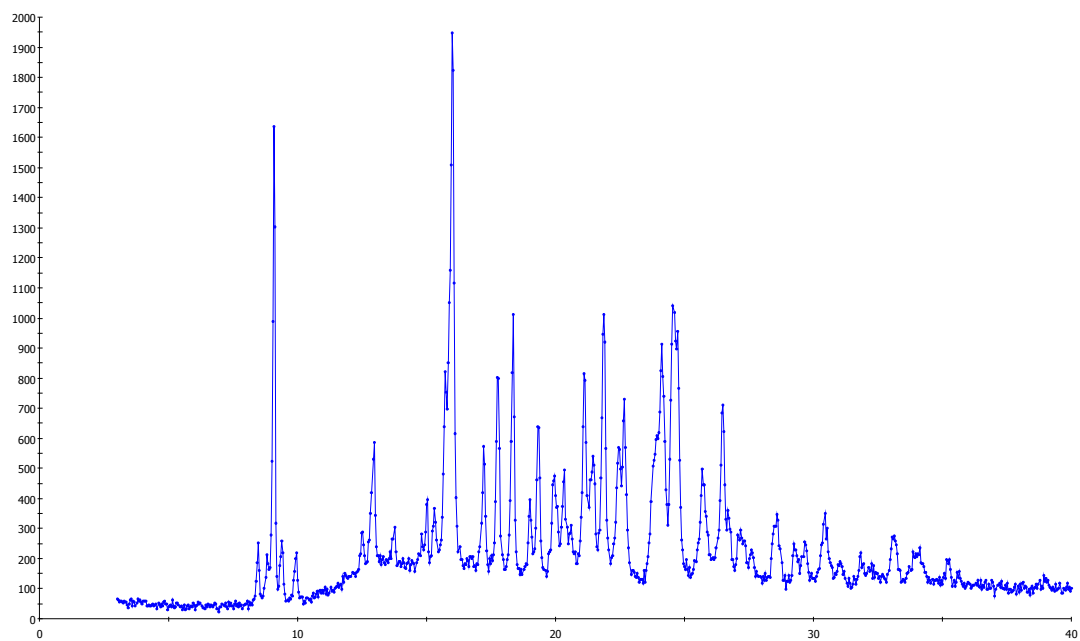

**Figure S14.** Experimental powder X-ray diffraction pattern of **1f**.

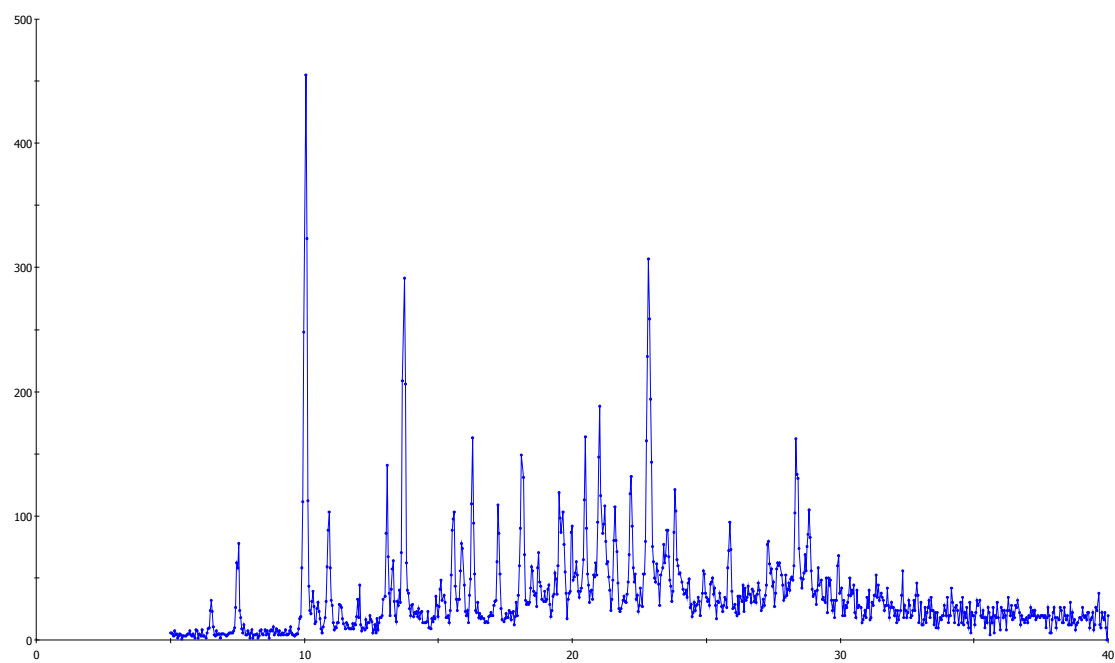

**Figure S15.** Experimental powder X-ray diffraction pattern of **1g**.



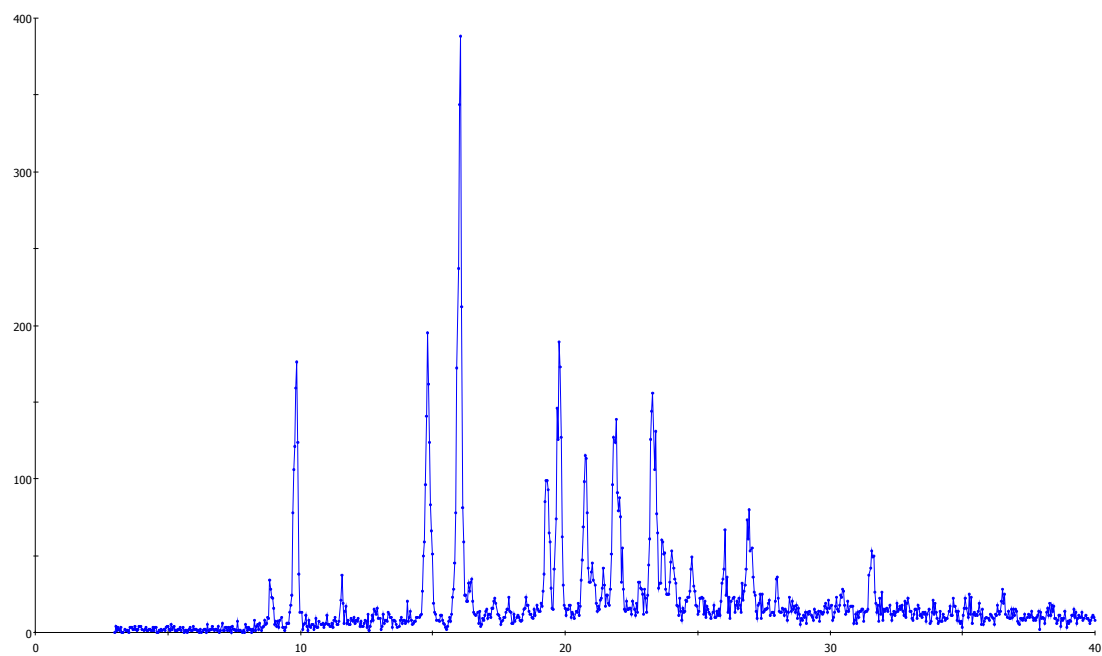

**Figure S16.** Experimental powder X-ray diffraction pattern of **1h**.

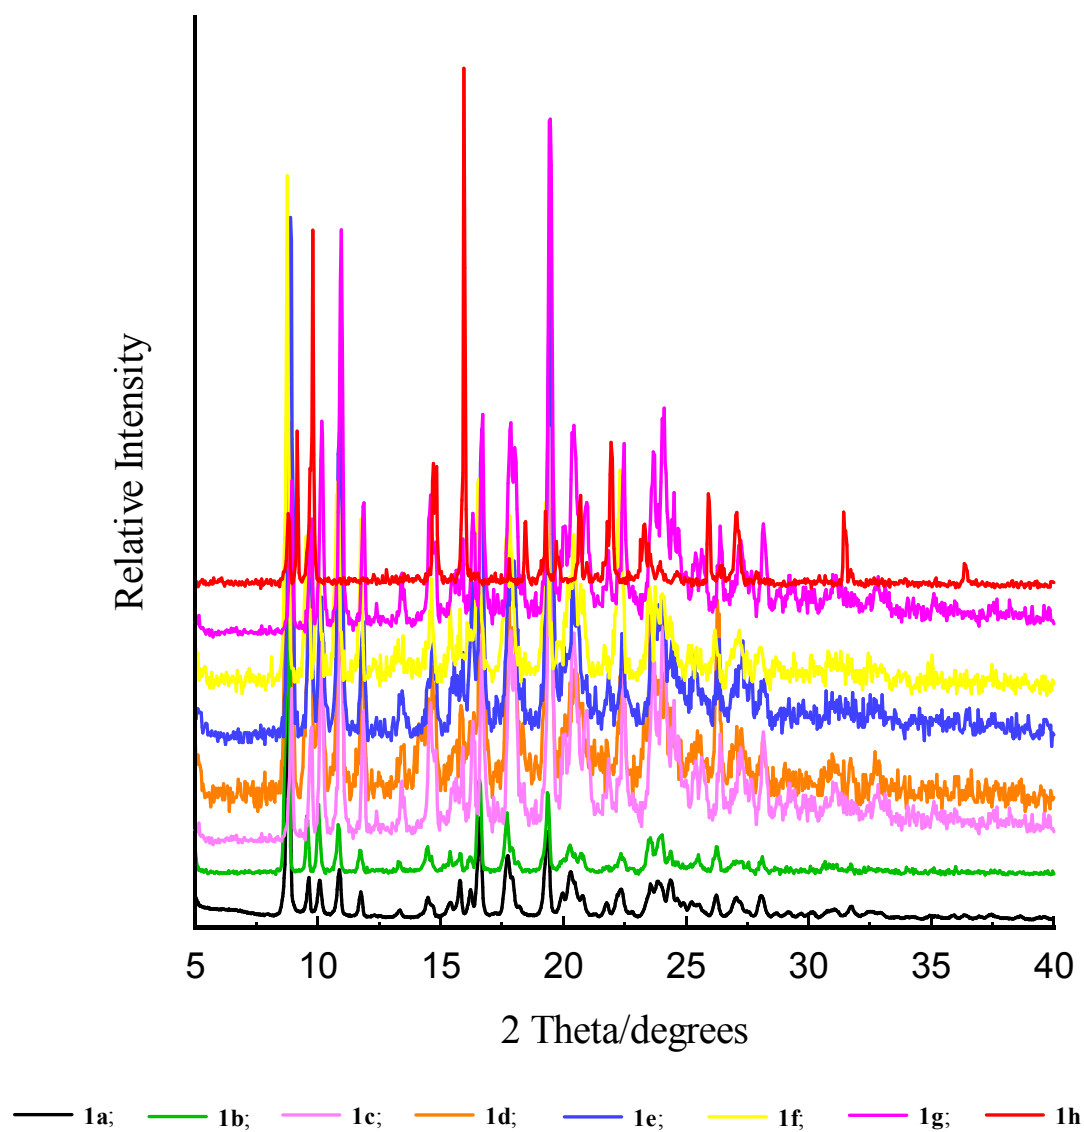

**Figure S17.** Experimental powder X-ray diffraction pattern of desolvated materials after heating at ca. 200 °C.

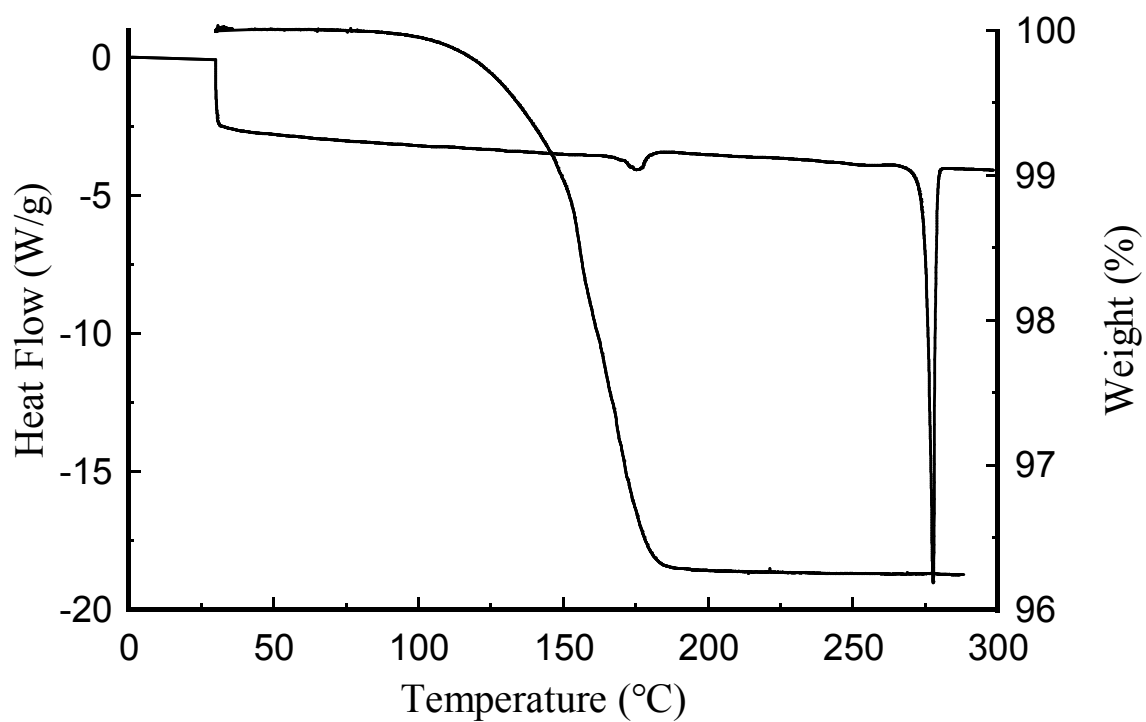

**Figure S18.**DSC and TGA thermogram of **1a**

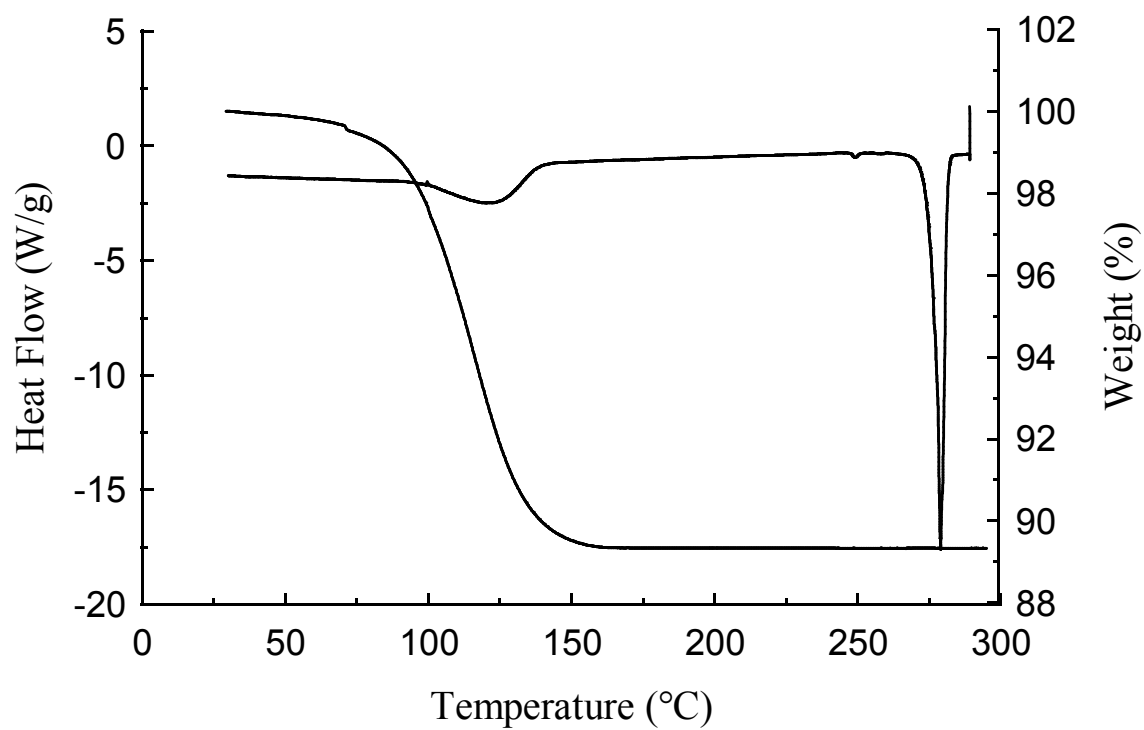

**Figure S19.**DSC and TGA thermogram of **1b**

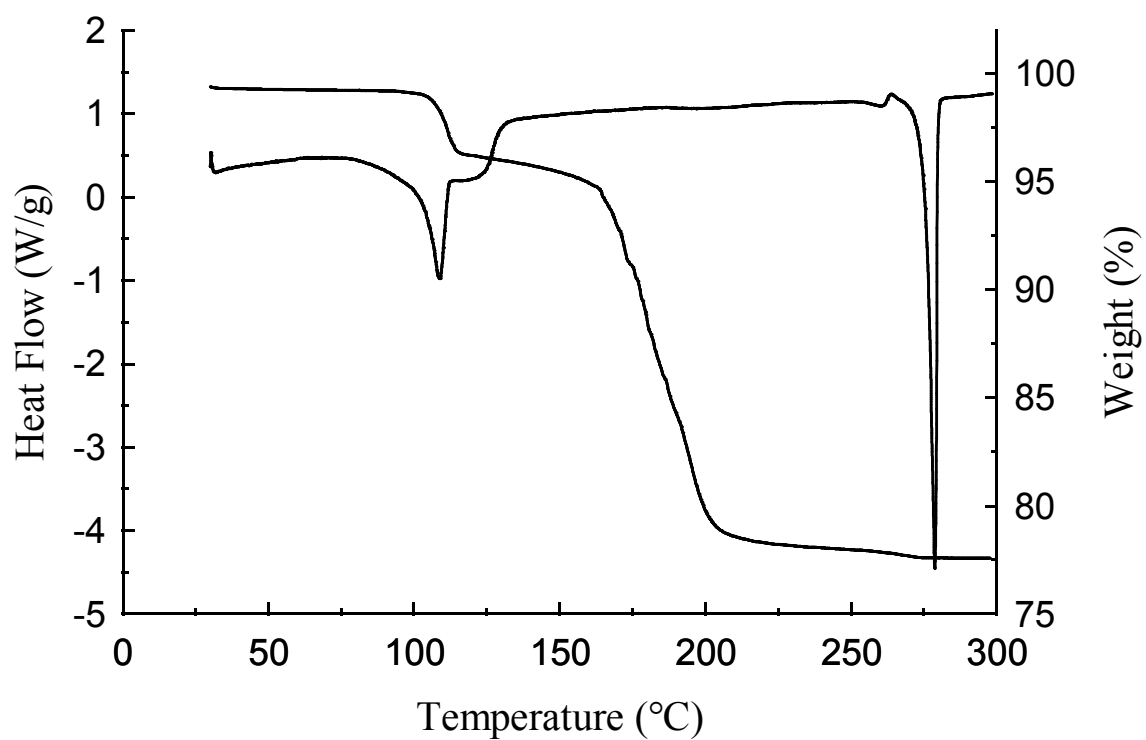

**Figure S20.**DSC and TGA thermogram of **1c**

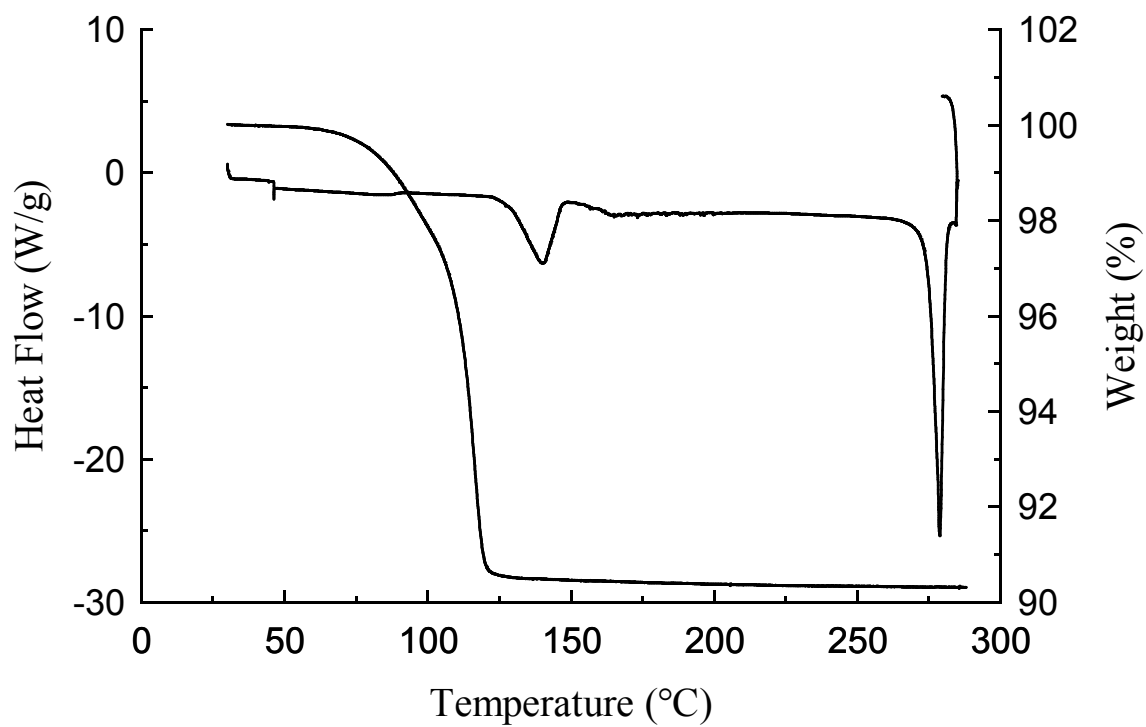

**Figure S21.**DSC and TGA thermogram of **1d**

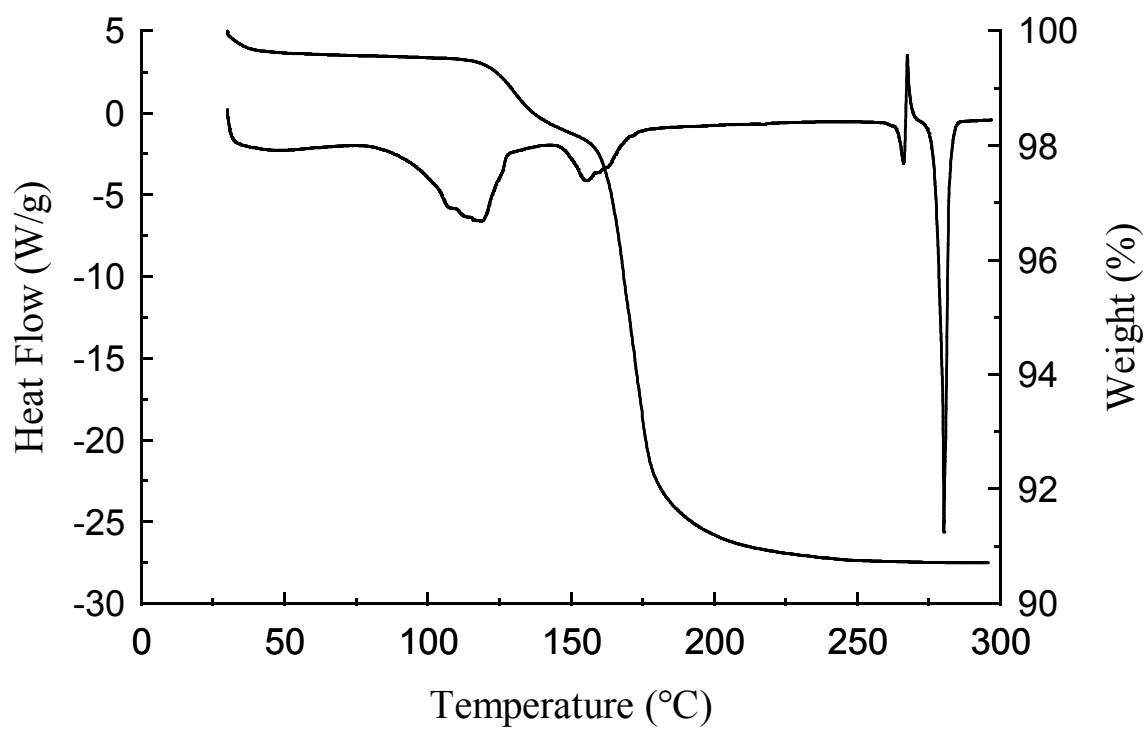

**Figure S22.**DSC and TGA thermogram of **1e**

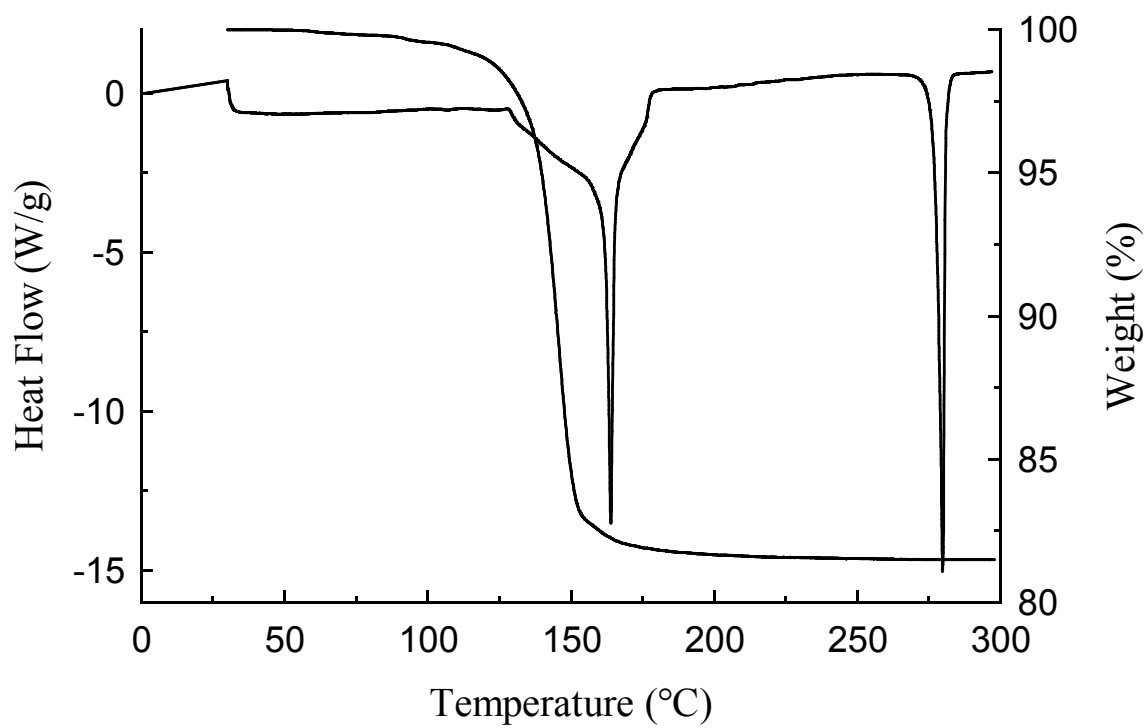

**Figure S23.**DSC and TGA thermogram of **1f**

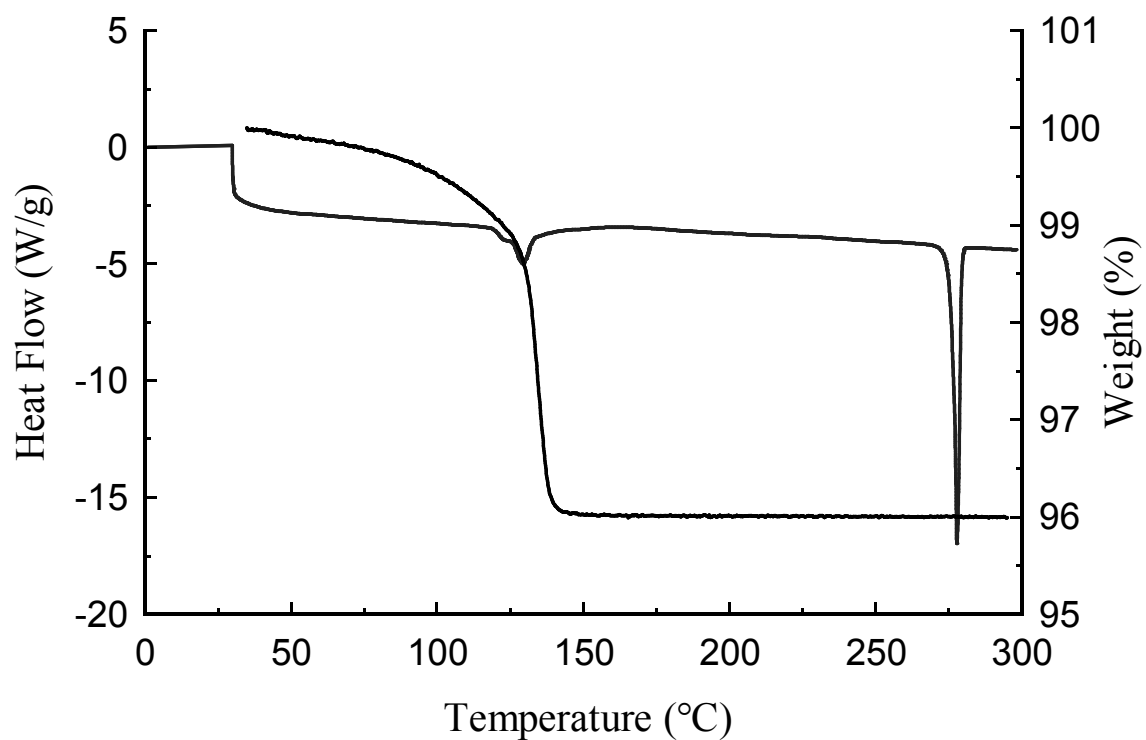

**Figure S24.**DSC and TGA thermogram of **1g**

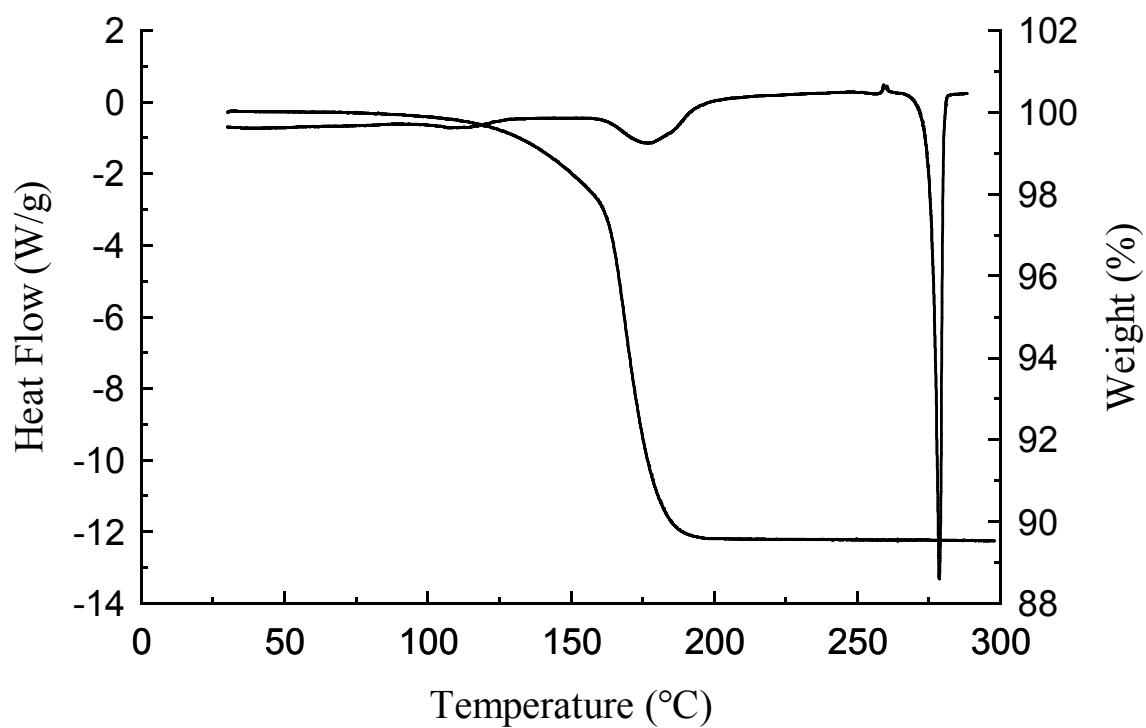

**Figure S25.**DSC and TGA thermogram of **1h**

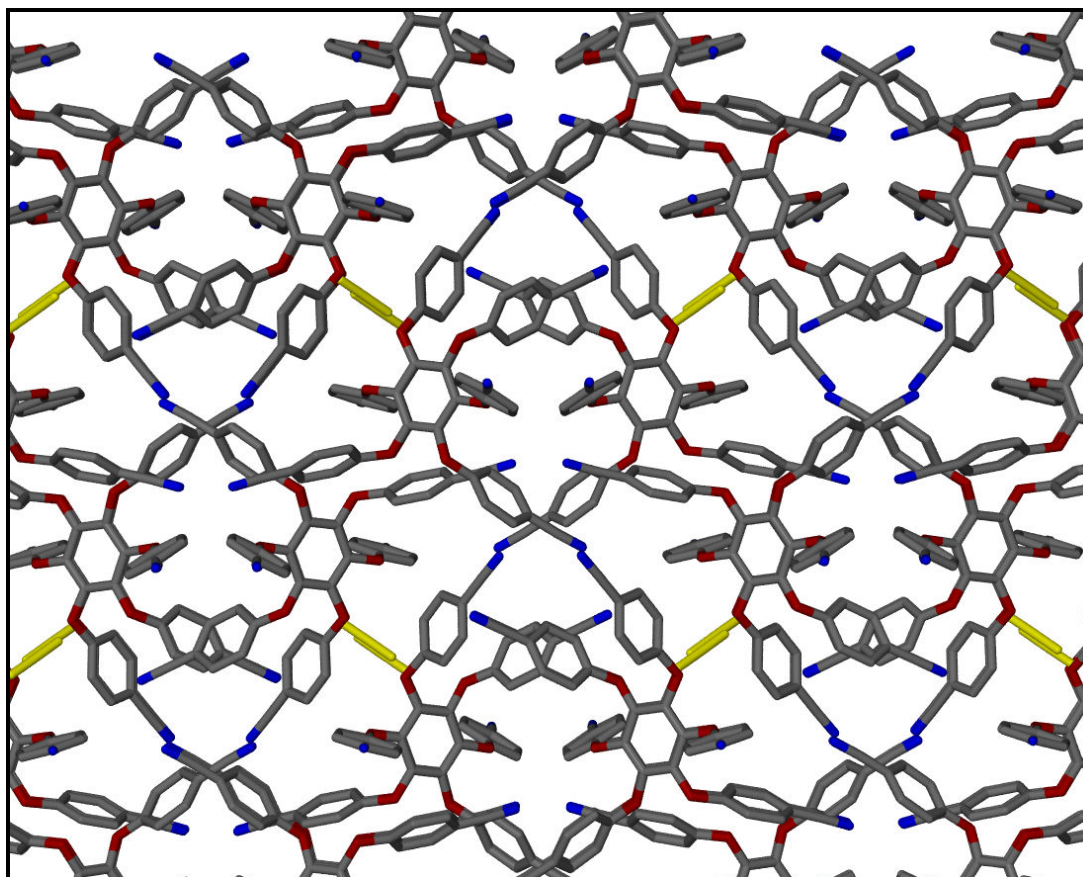

**Figure S26.** Packing diagram of **1a**, viewed along the *b* axis. Hydrogen atoms are omitted for clarity. Acetonitrile molecules are shown in yellow.

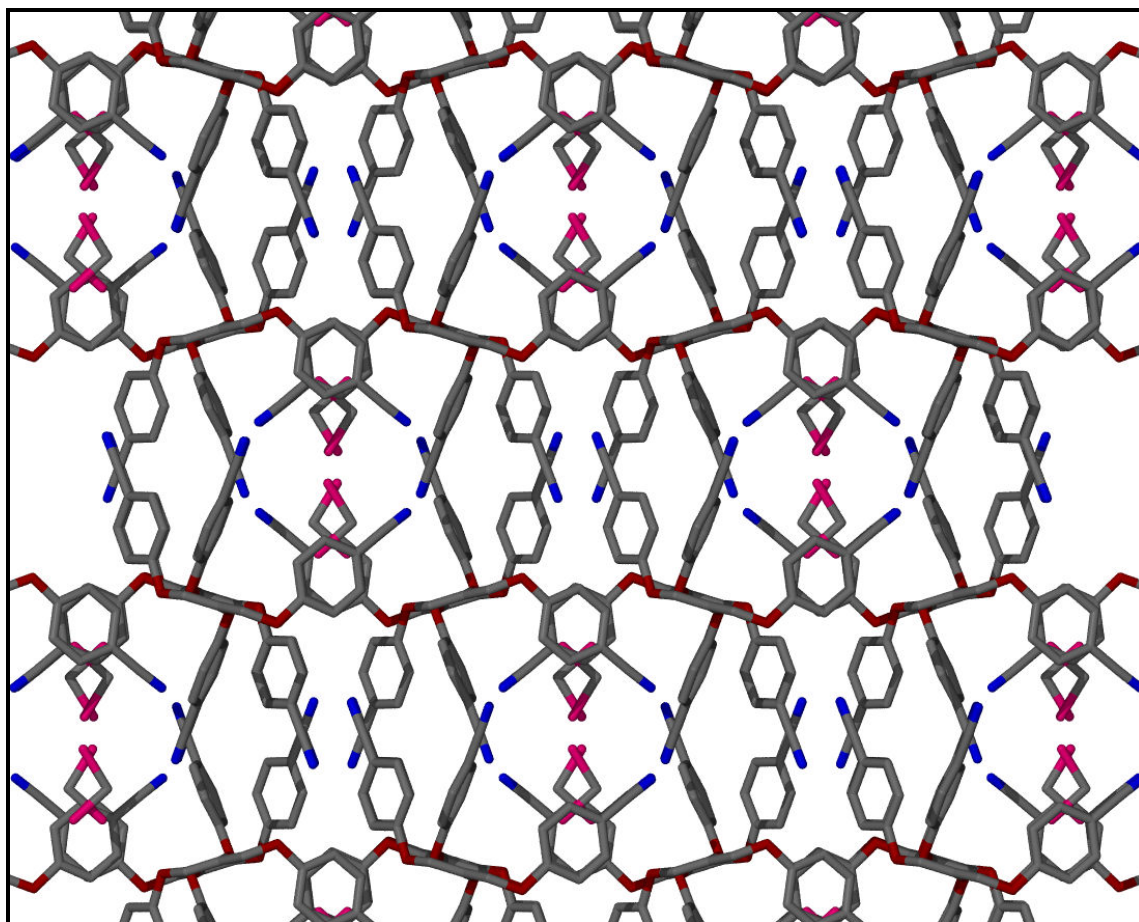

**Figure S27.** Packing diagram of **1b**, viewed along the *c* axis. Hydrogen atoms are omitted for clarity.



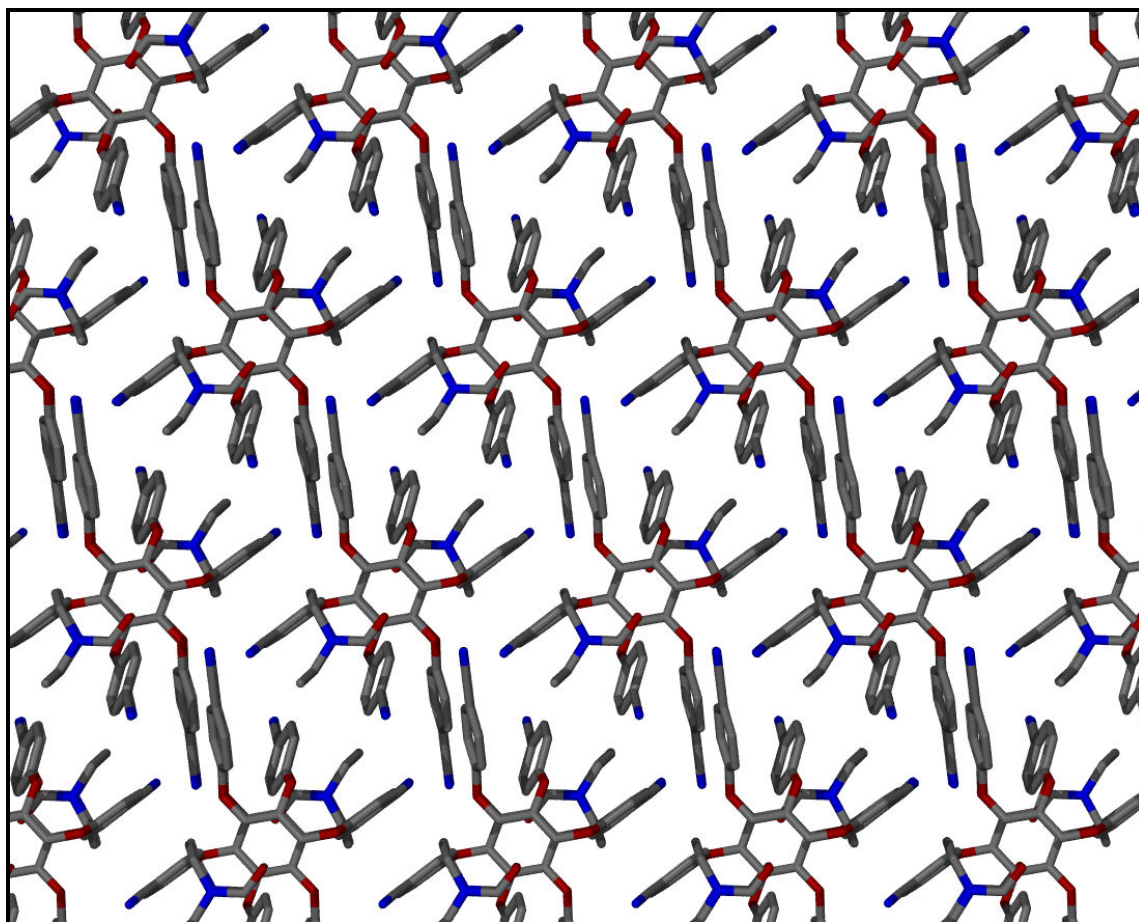

**Figure S28.** Packing diagram of **1c**, viewed along the *c* axis. Hydrogen atoms are omitted for clarity.

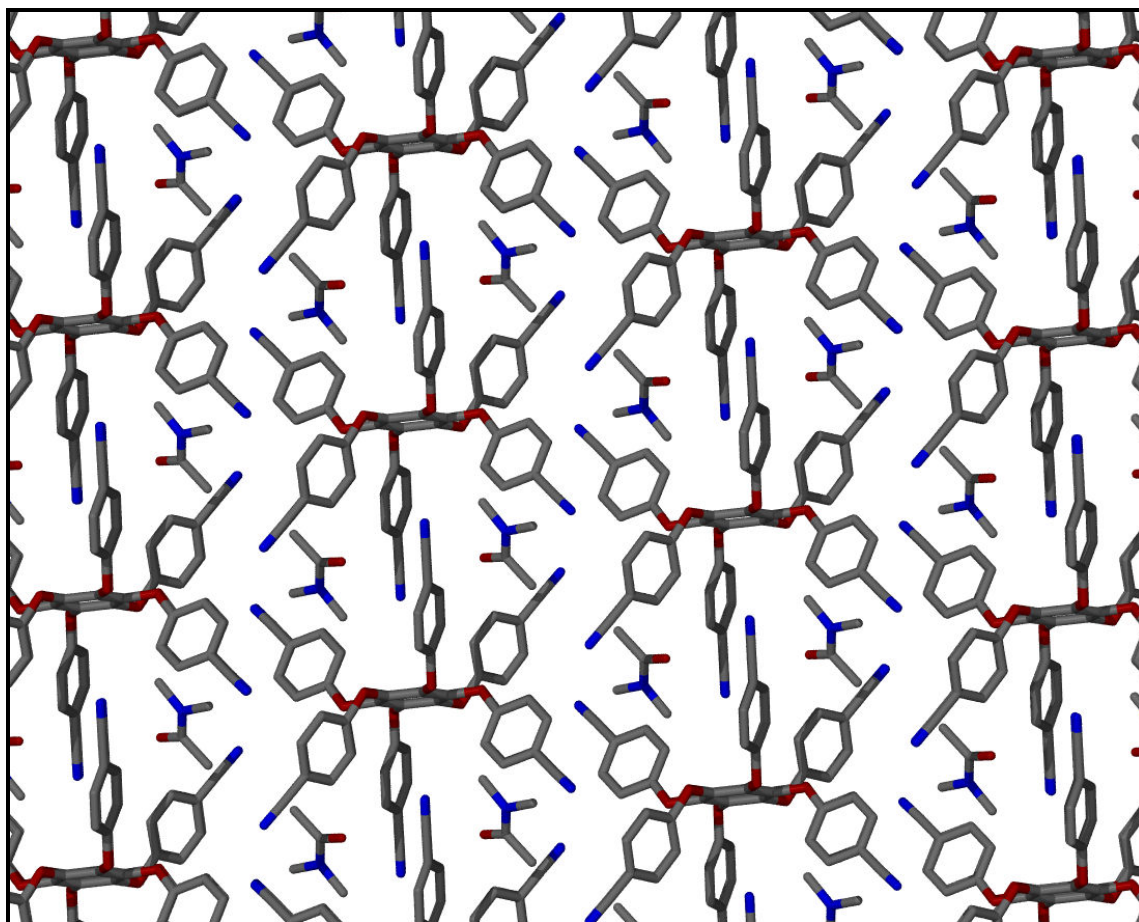

**Figure S29.** Packing diagram of **1d**, viewed along the *a* axis. Hydrogen atoms are omitted for clarity.

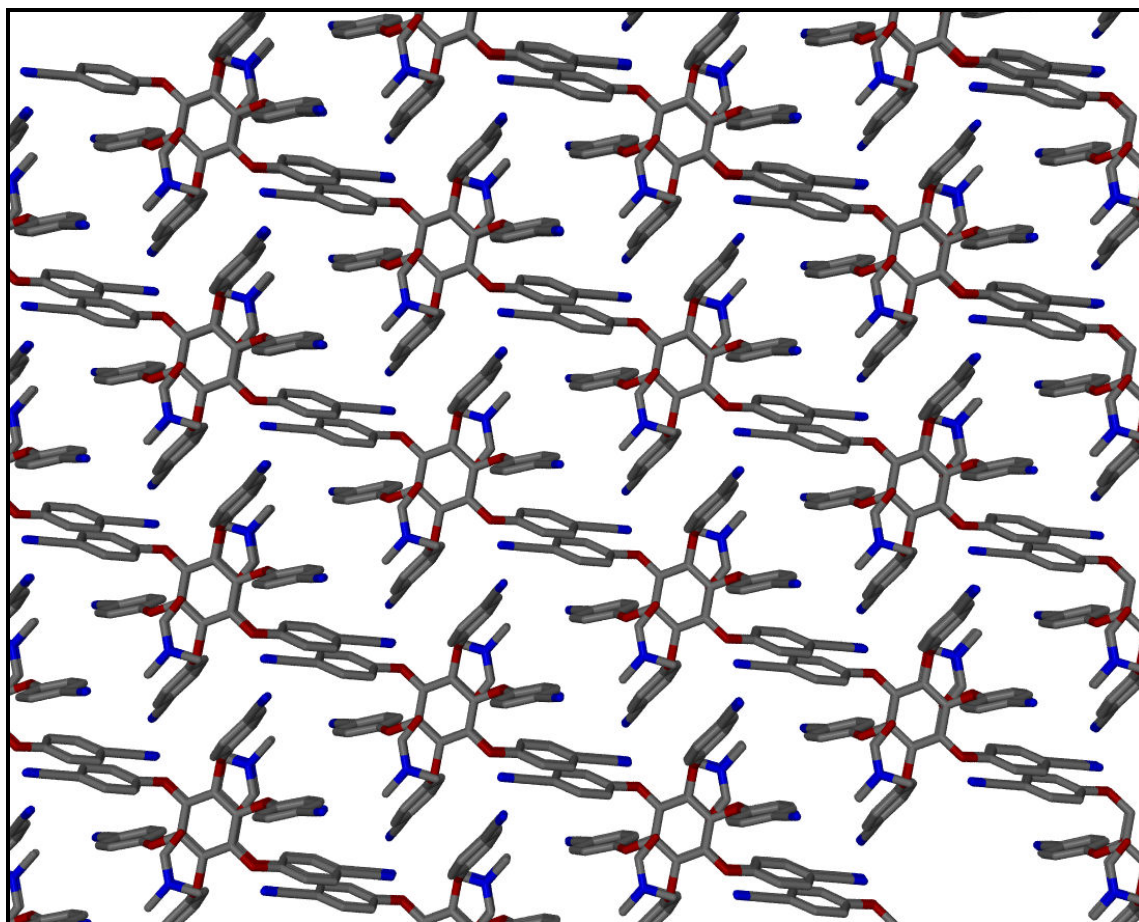

**Figure S30.** Packing diagram of **1e**, viewed along the *b* axis. Hydrogen atoms are omitted for clarity.

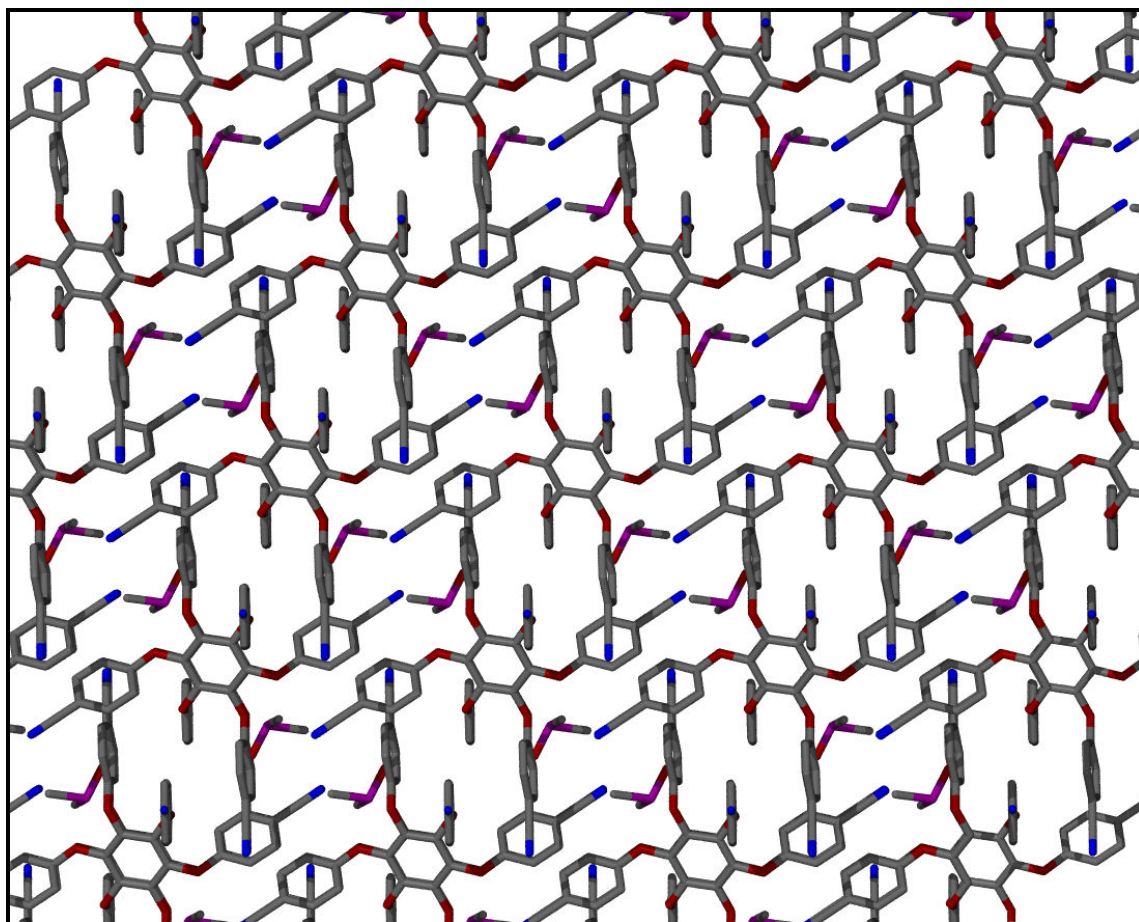

**Figure S31.** Packing diagram of **1f**, viewed along the *b* axis. Hydrogen atoms are omitted for clarity.



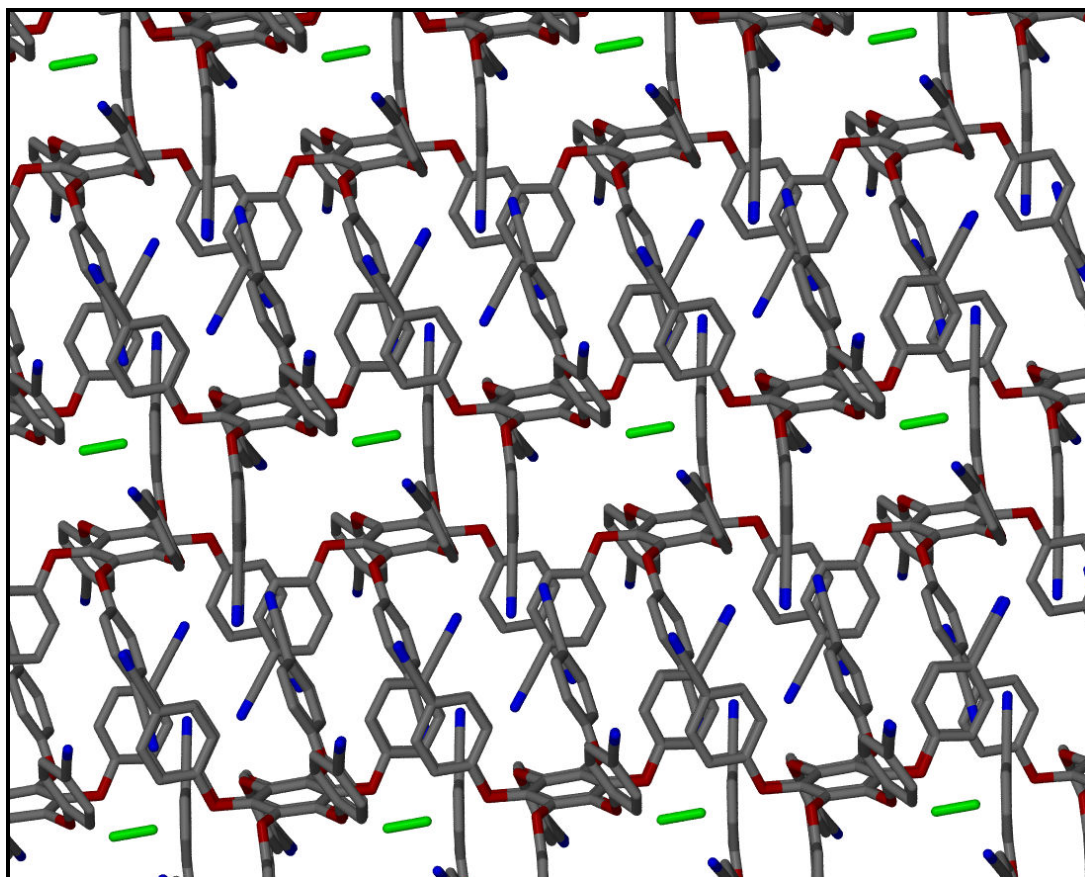

**Figure S32.** Packing diagram of **1g** viewed along the *c* axis. Hydrogen atoms are omitted for clarity. Methanol molecules are shown in green.

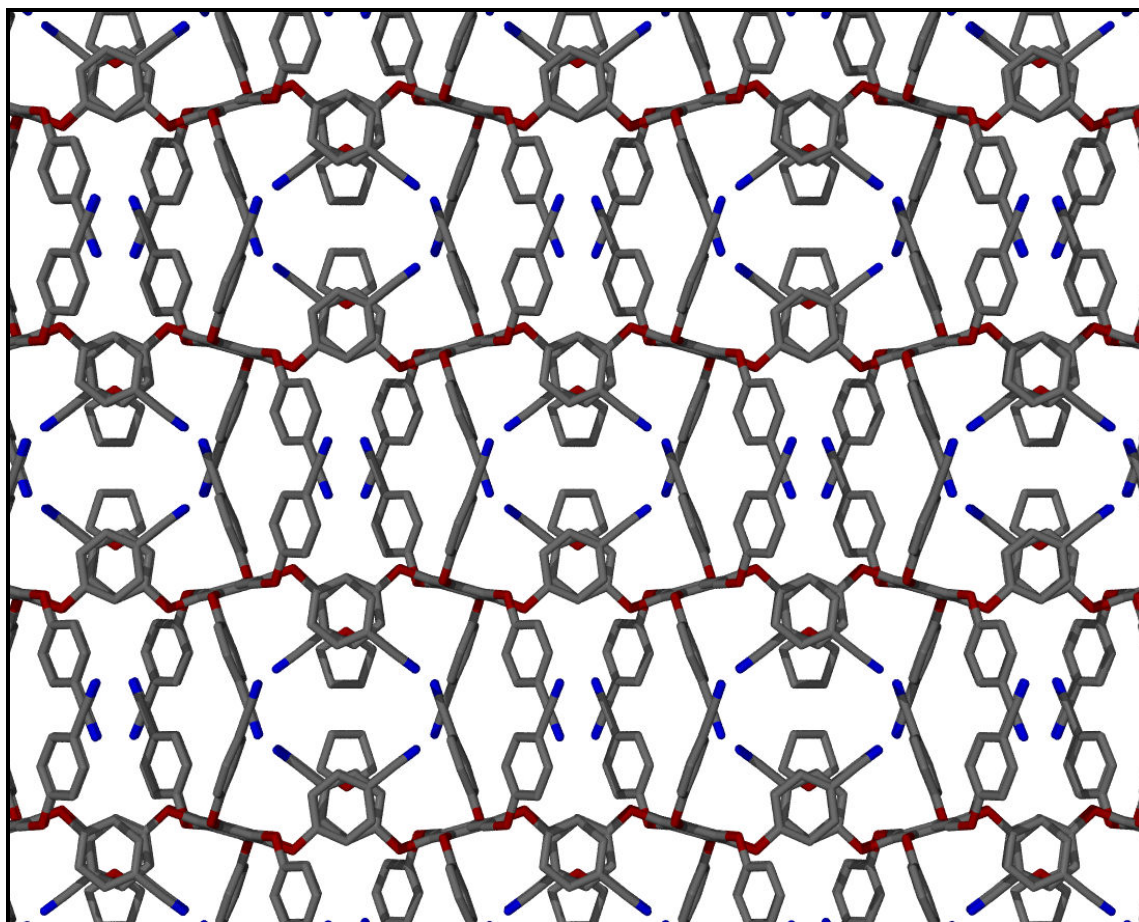

**Figure S33.** Packing diagram of **1h**, viewed along the *c* axis. Hydrogen atoms are omitted for clarity.

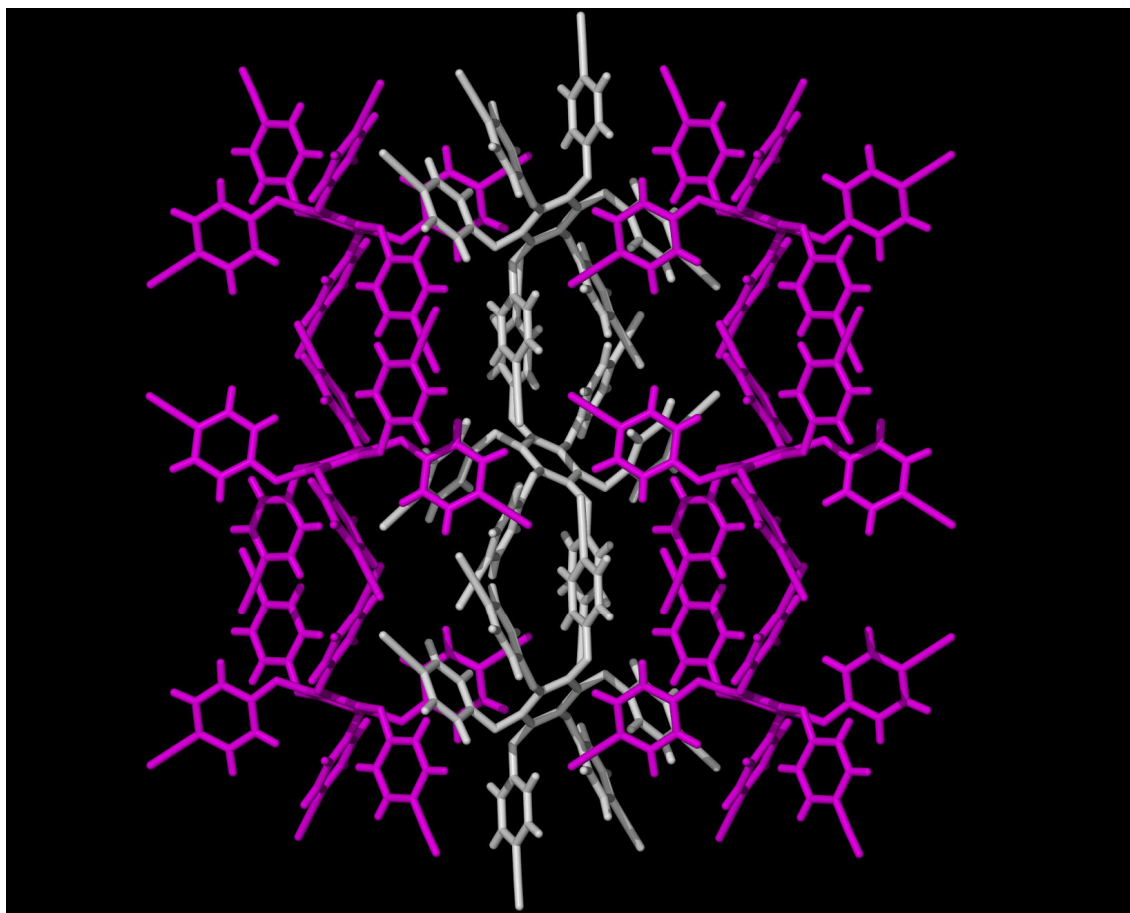

**Figure S34.** Packing diagram of **M1** viewed along [001]. This structure was obtained by melt-crystallization (described in ref 12 in the main text). Desolvation of all the solvates gives this crystal structures. The crystal structure contains two different conformations of molecule **1**. The purple molecules have the *ababab* conformation and the white molecules have the *aaabbb* conformation.
